# Supplementary material
Source: PubMed Central journal article supplement (PMC3158824)

whose classification performance did not achieve significance in the right SFS. **A** Left IPS. **B** Right medial SPL. **C** Right SFS.

**Supplementary Figure 1. Back-projection of MVPC weights.**

For each subject, classification rates from 6 seconds following the cue were binarized and back-projected into the brain. Here, a single slice through each region is presented for each subject.

**Supplementary Figure 2. Within-domain classification: Location Shift.**

Accuracy in classifying left-to-right from right-to-left shifts. **A** Left IPS. **B** Right medial SPL. **C** Right SFS.

**Supplementary Figure 3. Within-domain classification: Counter Shift.**

Accuracy in classifying Counter A-to-B from Counter B-to-A shifts. **A** Left IPS. **B** Right medial SPL. **C** Right SFS.

**Supplementary Figure 4. Mean-centered event-related multivoxel pattern classification.**

Mean-centering resulted in no qualitative and minimal quantitative changes to the er-MVPC results. See Figure 6 for comparison.

## **Cortical Mechanisms of Cognitive Control for Shifting Attention in Vision and Working Memory**

Benjamin J. Tamber-Rosenau, Michael Esterman, Yu-Chin Chiu, and Steven Yantis

We thank an anonymous reviewer for suggesting that the regions of interest (ROIs) submitted to multivoxel pattern classification (MVPC) could form a distributed network in which the pattern of mean ROI-level activations across ROIs could encode more or additional information compared to the within-ROI patterns analyzed in the main text. We tested this idea by performing an additional MVPC analysis comparing location shifts to counter shifts. For each event of interest, all voxels in each region were averaged, resulting in three ROI-specific means for each event. These were entered into a new MVPC analysis for each subject at each timepoint in which the three ROI means were the three features for the SVM. The SVMs used for this MVPC analysis were otherwise identical to those used in the main analysis (i.e., same cost value, same independence of timepoints). This led to 72 total tests (12 timepoints, -8 sec to 14 sec in 2 sec steps; 6 subjects). Only 5 of these tests resulted in significantly above-chance classification ( $p < .05$  calculated via the randomization test), and these tests were distributed across only three subjects and occurred at various timepoints, not at the expected peak of the BOLD response.

**Supplemental Table 1. Spatial and WM attentional control regions.**

| <b>Contrast</b> | <b>Sign</b> | <b>X</b> | <b>Y</b> | <b>Z</b> | <b>Volume</b> | <b>Region Label</b>                          |
|-----------------|-------------|----------|----------|----------|---------------|----------------------------------------------|
| LocSh – Hold    | +           | 49       | -45      | 11       | 972           | Superior Temporal Gyrus                      |
|                 | +           | 30       | -82      | 28       | 324           | Cuneus                                       |
|                 | -           | 29       | -33      | 8        | 297           | Caudate                                      |
|                 | +           | 21       | -2       | 59       | 1890          | SFG                                          |
|                 | +           | 23       | 48       | 34       | 486           | SFG                                          |
|                 | +           | 8        | -61      | 47       | 2889          | SPL / Precuneus / IPS                        |
|                 | +           | -17      | -64      | 45       | 2295          | SPL / Precuneus / IPS                        |
|                 | +           | -15      | -6       | 66       | 351           | SFG                                          |
|                 | +           | -21      | -7       | 52       | 837           | SFS                                          |
|                 | +           | -36      | -46      | 38       | 594           | SMG / SPL / IPS                              |
| CouSh – Hold    | +           | 50       | -41      | 42       | 675           | Inferior Parietal Lobule                     |
|                 | +           | 41       | 28       | 29       | 1215          | MFG                                          |
|                 | +           | 25       | 3        | 49       | 1134          | SFS                                          |
|                 | +           | 13       | -66      | 44       | 486           | Precuneus                                    |
|                 | +           | -7       | -3       | 53       | 513           | SFG                                          |
|                 | -           | -8       | 48       | 19       | 513           | SFG                                          |
|                 | -           | -10      | 55       | 24       | 324           | SFG                                          |
|                 | -           | -8       | -53      | 17       | 405           | Posterior Cingulate / Precuneus              |
|                 | +           | -15      | -4       | 19       | 351           | Caudate                                      |
|                 | +           | -16      | 2        | 8        | 378           | Globus Pallidus                              |
|                 | -           | -34      | -59      | -13      | 351           | Fusiform Gyrus                               |
|                 | -           | -33      | -84      | 6        | 432           | MOG                                          |
|                 | +           | -34      | -45      | 37       | 297           | SPL / IPS                                    |
|                 | -           | -39      | -72      | 0        | 1431          | MOG / Inferior Occipital Gyrus               |
|                 | -           | -31      | -33      | -14      | 405           | Parahippocampal Gyrus                        |
|                 | -           | -38      | -16      | 2        | 540           | Insula                                       |
| LocSh – CouSh   | -           | 51       | -10      | 31       | 324           | Precentral Gyrus                             |
|                 | -           | 51       | -43      | 43       | 783           | Inferior Parietal Lobule / SMG               |
|                 | +           | 43       | 16       | 8        | 324           | IFG / Frontal Operculum                      |
|                 | +           | 29       | -77      | 21       | 4779          | Precuneus / Cuneus / MOG                     |
|                 | +           | 40       | -64      | -7       | 324           | MOG                                          |
|                 | +           | 1        | -49      | 47       | 6642          | Precuneus                                    |
|                 | +           | 9        | -58      | 11       | 432           | Lingual Gyrus / Calcarine Sulcus / Precuneus |
|                 | +           | -2       | -25      | 41       | 459           | Cingulate Gyrus                              |
|                 | +           | -2       | 41       | 2        | 351           | Anterior Cingulate                           |
|                 | +           | -7       | -57      | 16       | 297           | Posterior Cingulate                          |
|                 | +           | -15      | -72      | 29       | 783           | Precuneus                                    |
|                 | +           | -34      | -80      | 8        | 5913          | MOG / Angular Gyrus                          |
|                 | +           | -27      | 22       | 44       | 405           | MFG                                          |
|                 | +           | -26      | -51      | -8       | 594           | Lingual Gyrus / Fusiform Gyrus               |
|                 | -           | -37      | 28       | 22       | 459           | MFG                                          |
|                 | -           | -37      | 37       | 6        | 297           | IFG                                          |
|                 | +           | -38      | -67      | -17      | 297           | Inferior Occipital Gyrus                     |
| Conjunction     | +           | 24       | 1        | 55       | 378           | SFS / SFG / MFG                              |
|                 | +           | 11       | -66      | 45       | 486           | Medial SPL / Precuneus                       |
|                 | +           | -36      | -47      | 39       | 405           | IPS / SPL                                    |

Complete set of regions passing threshold in select contrasts. Abbreviations used in table: LocSh – Location Shift; CouSh – Counter Shift; Conjunction – Conjunction of Location Shift – Hold and Counter Shift – Hold; Sign – Sign of Contrast, where + indicates the nominal direction and – indicates the opposite direction; X, Y, Z – Talairach coordinates of center of mass of region; Volume – Volume in mm<sup>3</sup> of region; SFG – Superior Frontal Gyrus; SPL – Superior Parietal Lobule; IPS – Intraparietal Sulcus; SFS – Superior Frontal Sulcus; SMG – Supramarginal Gyrus; MFG – Middle Frontal Gyrus; MOG – Middle Occipital Gyrus; IFG – Inferior Frontal Gyrus.

**A**

Intraparietal Sulcus

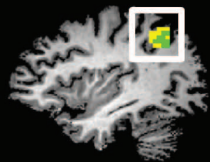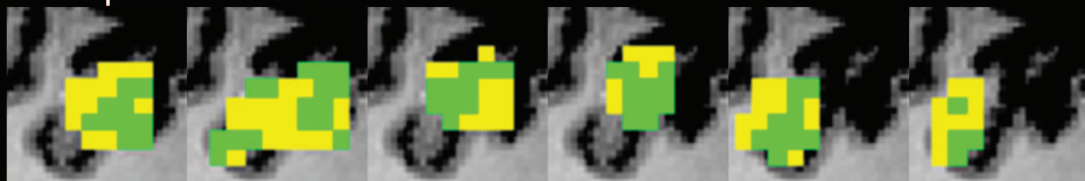

X = -36

**B**

Superior Parietal Lobule

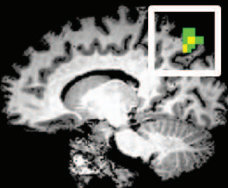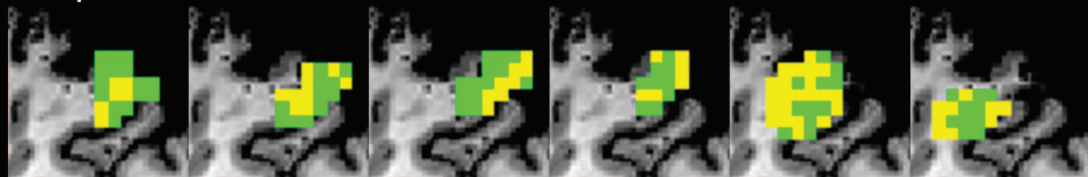

X = 12

**C**

Superior Frontal Sulcus

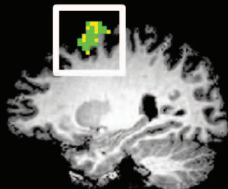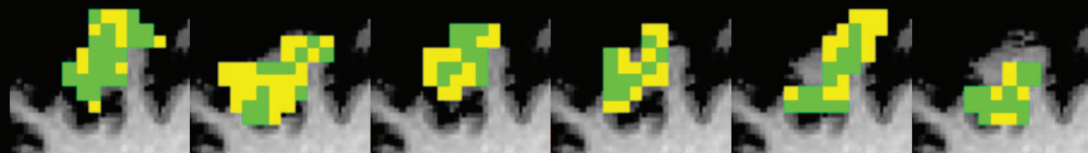

X = 24

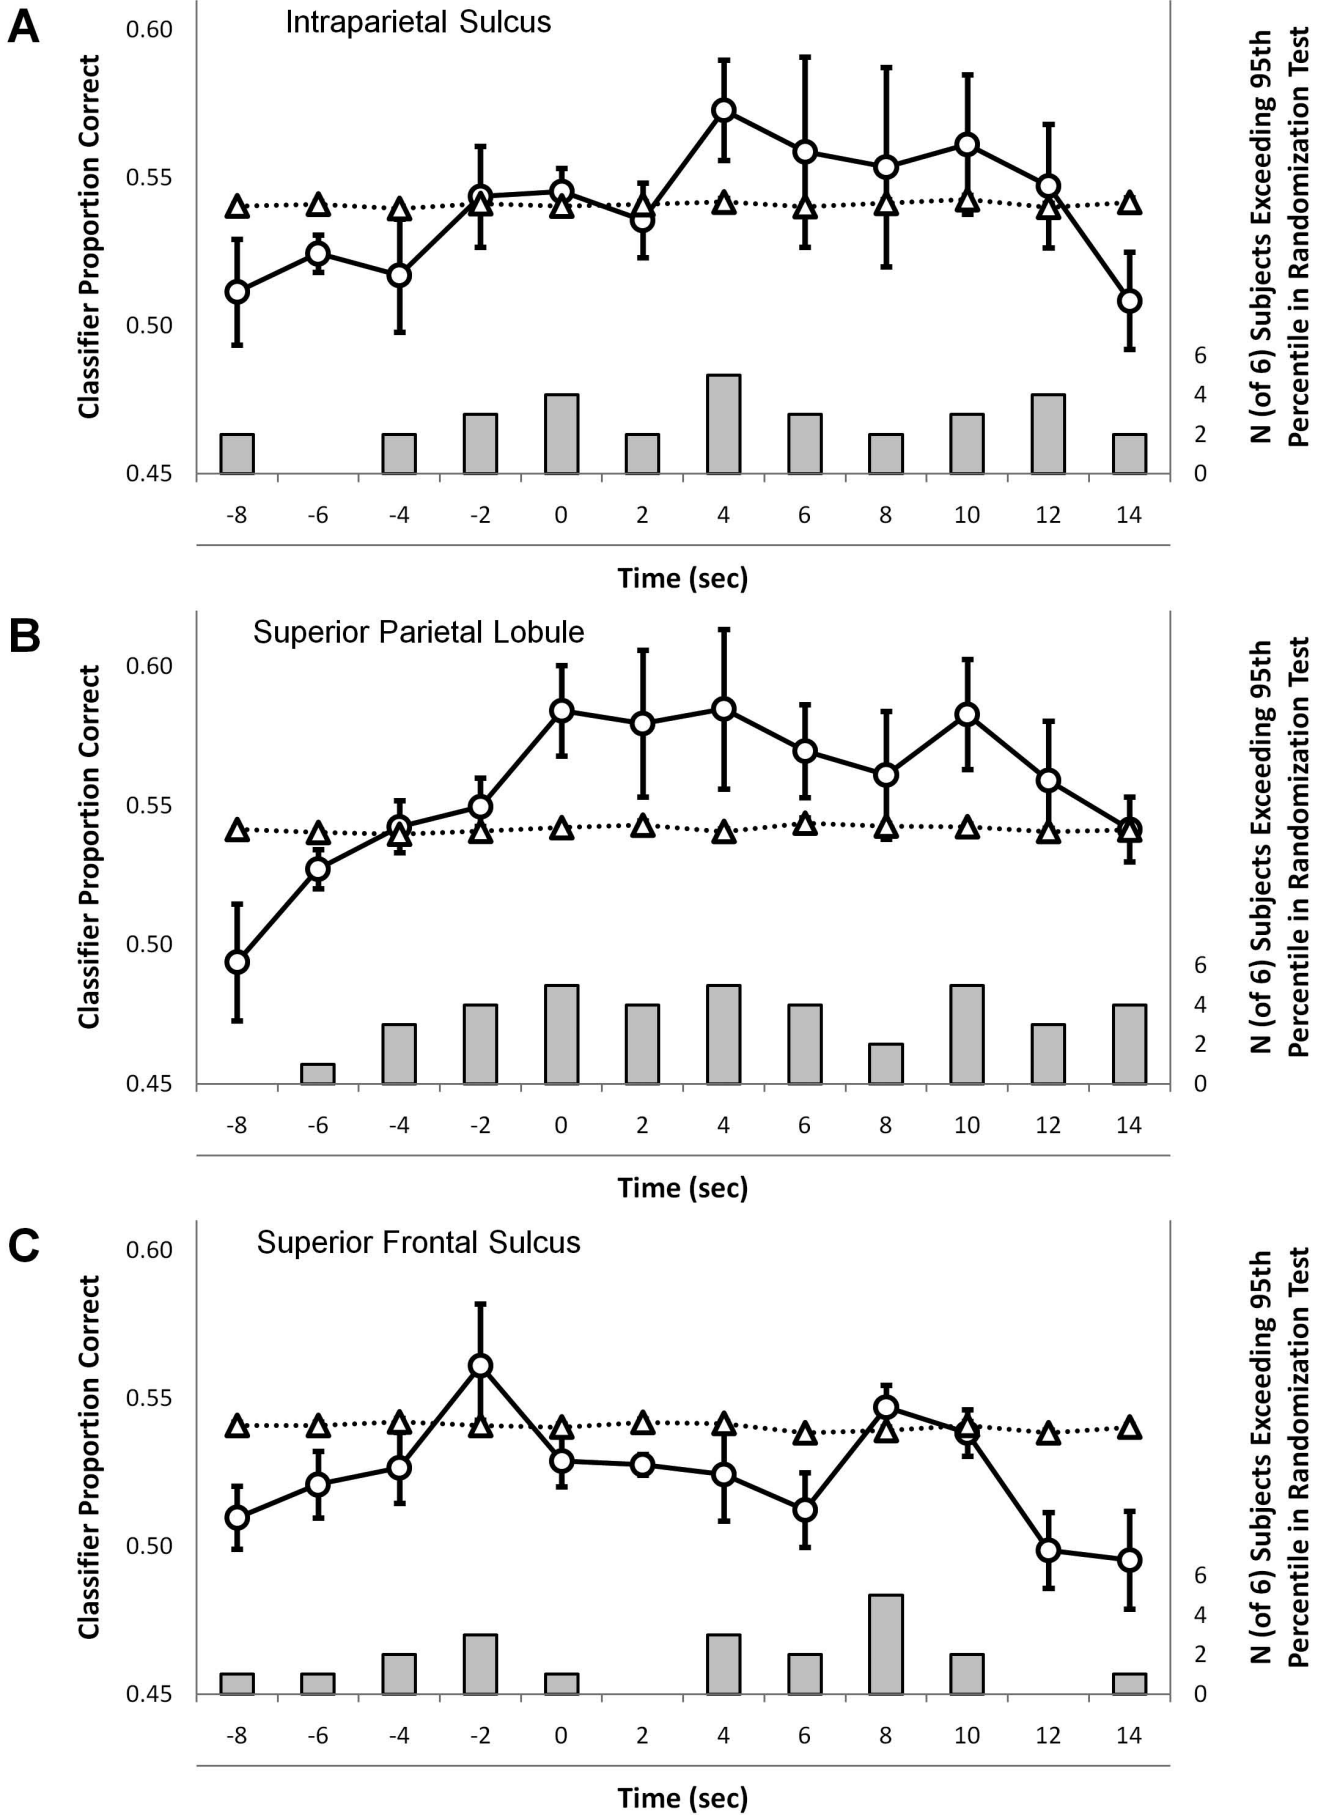

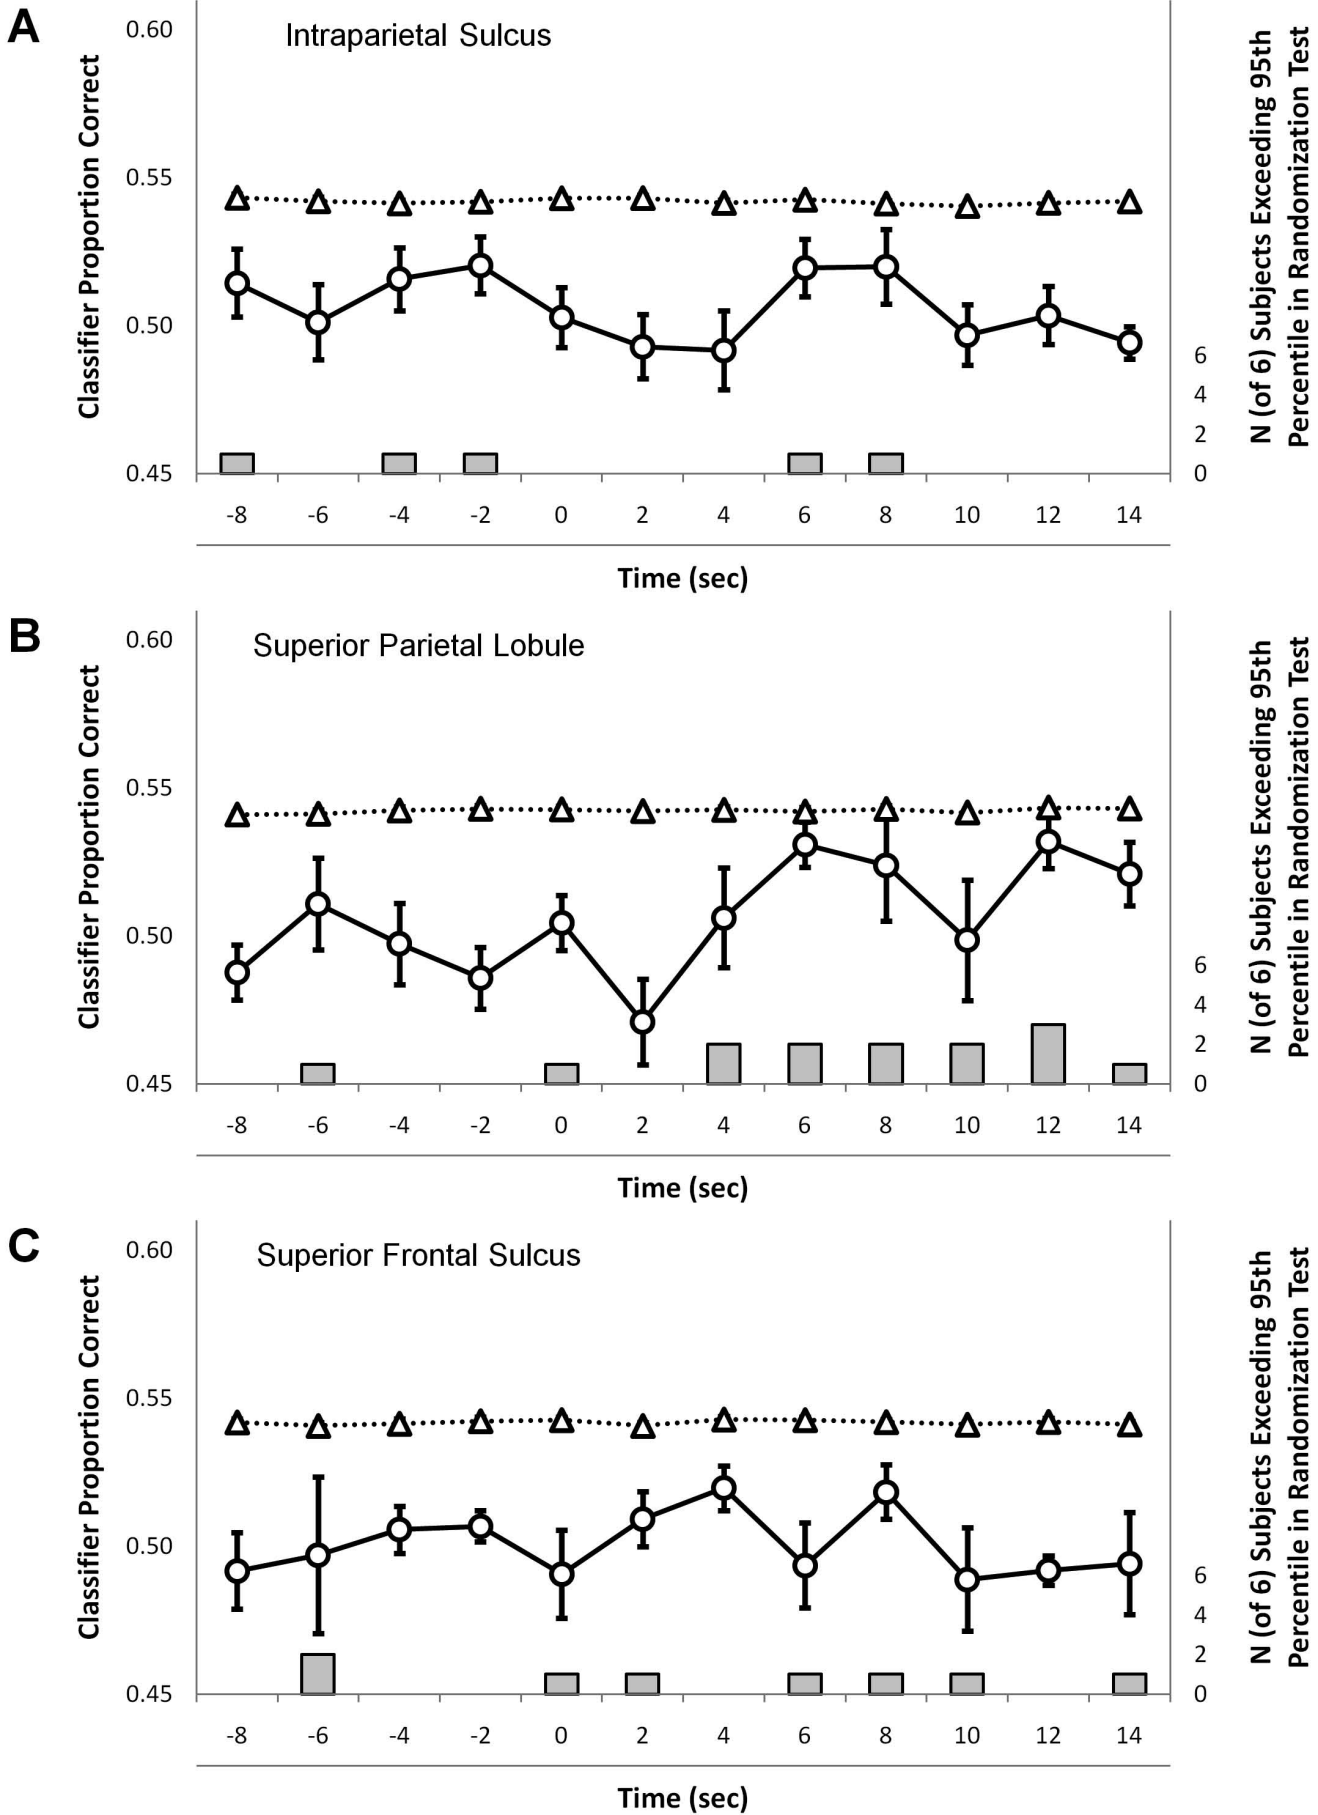

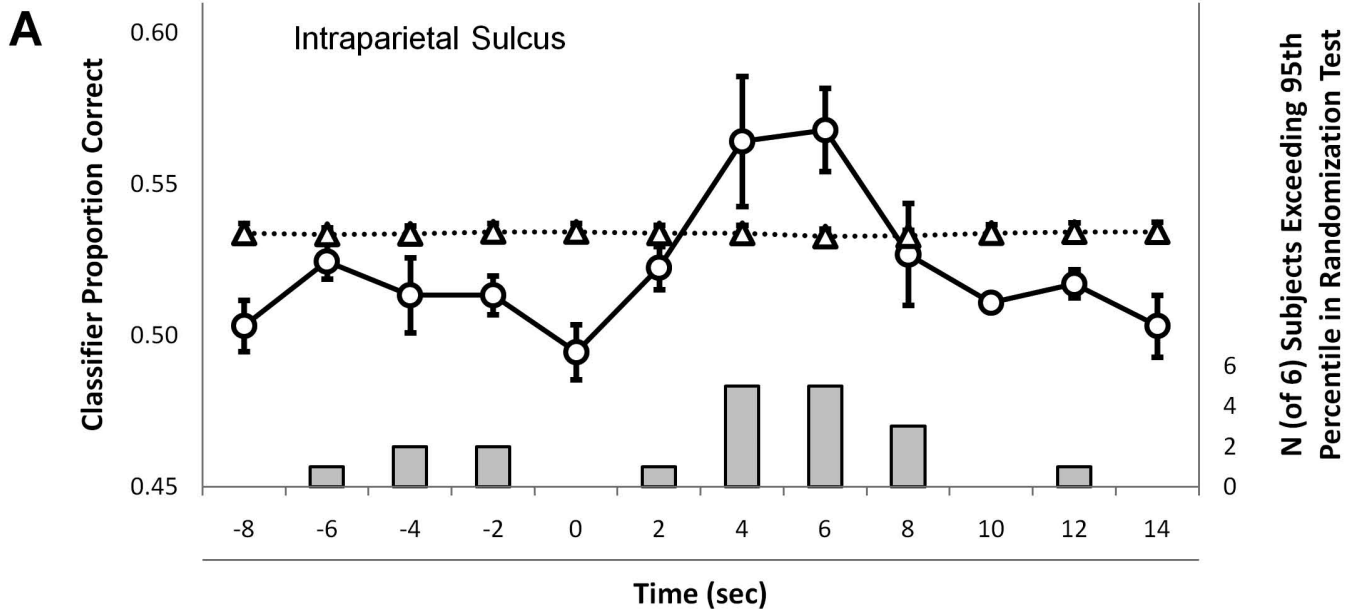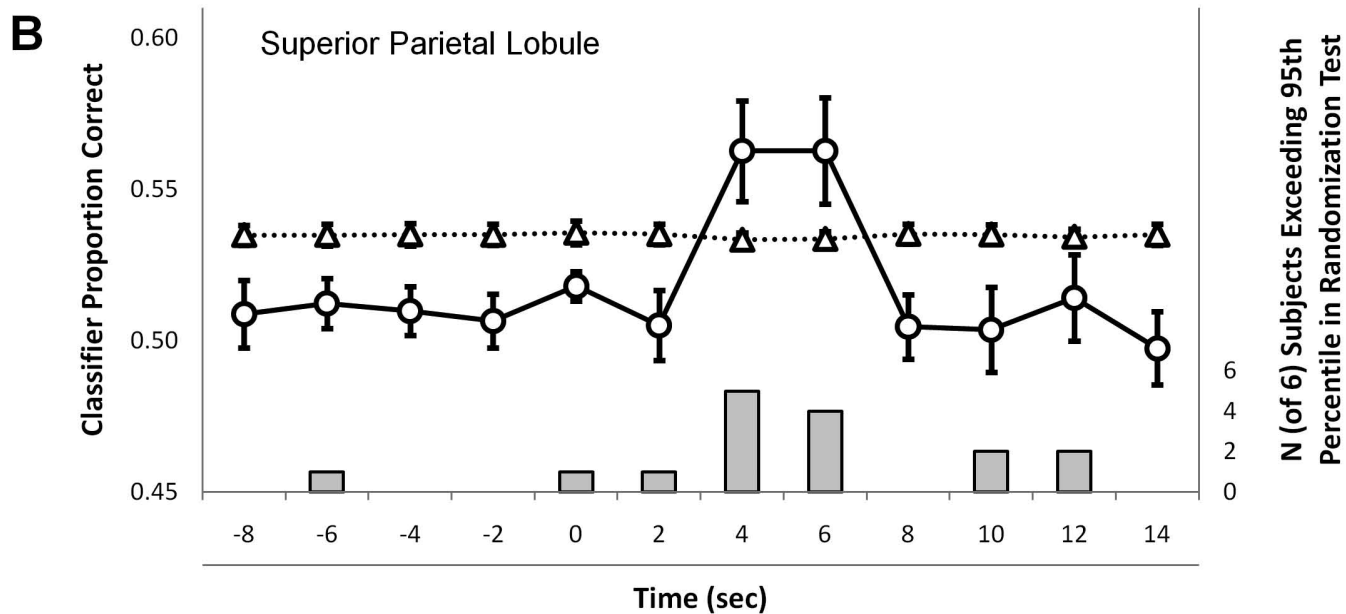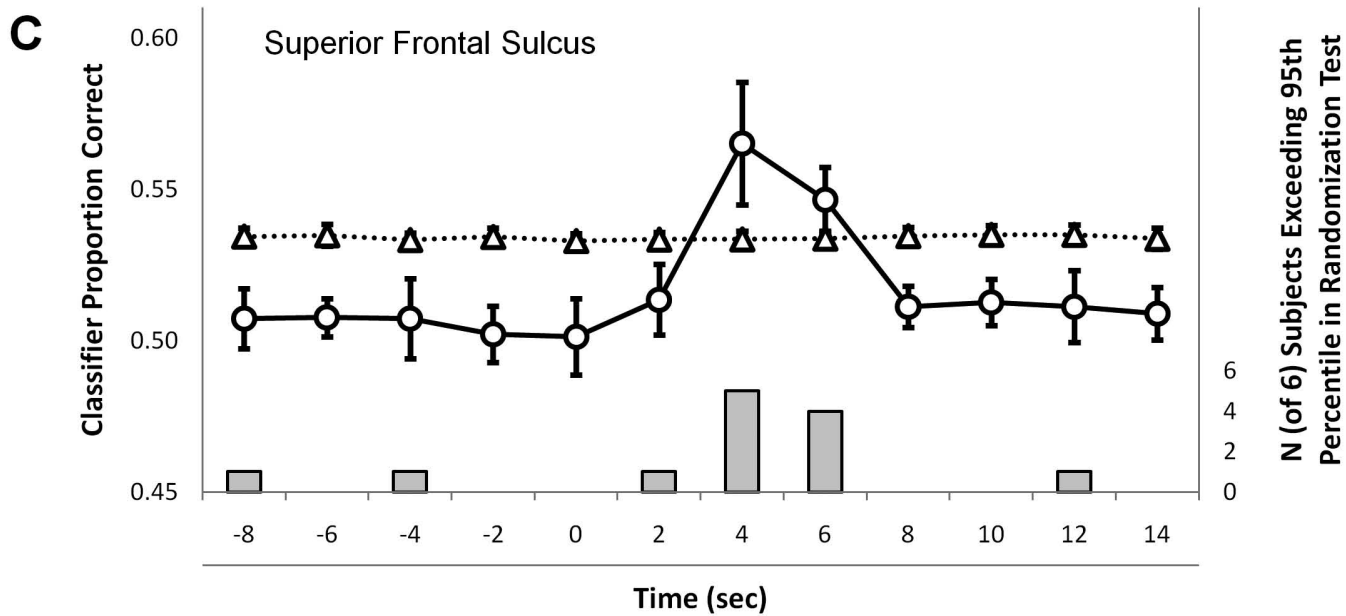

Supplement: NIHMS293261-supplement-supplement_1.pdf [file NIHMS293261-supplement-supplement_1.pdf]
